# Supplementary material for: Extraction, purification, and clumped isotope analysis of methane (Δ 13 CDH 3 and Δ 12 CD 2 H 2 ) from sources and the atmosphere
Source: Copernicus journal article supplement (doi:10.5194/amt-17-2687-2024), 2024-05-07
Supplement: Supplementary file 1 [file amt-17-2687-2024-supplement.pdf]

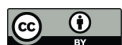

*Supplement of*

## **Extraction, purification, and clumped isotope analysis of methane ( $\Delta^{13}\text{CDH}_3$ and $\Delta^{12}\text{CD}_2\text{H}_2$ ) from sources and the atmosphere**

**Malavika Sivan et al.**

*Correspondence to:* Malavika Sivan (m.sivan@uu.nl)

The copyright of individual parts of the supplement might differ from the article licence.

SI

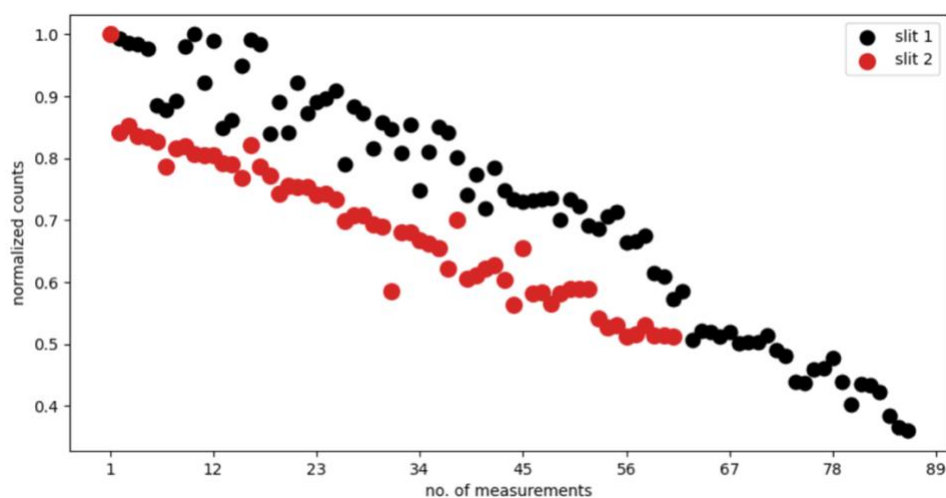

Fig S1: Normalized counts of detector L3 (mass 16) vs the number of measurements since a new slit was installed, each colour representing one slit as mentioned in the legend.

Table S1: Overview of the isotopic composition of the samples presented in Fig 11.

| Samples                  | $\delta^{13}\text{C}$ (‰) | $\delta\text{D}$ (‰) | $\Delta^{13}\text{CDH}_3$ (‰) | se   | $\Delta^{12}\text{CD}_2\text{H}_2$ (‰) | se   |
|--------------------------|---------------------------|----------------------|-------------------------------|------|----------------------------------------|------|
| Thermogenic 1            | -48.43                    | -166.78              | 3.37                          | 0.33 | 9.44                                   | 2.09 |
| Thermogenic 2            | -34.86                    | -101.22              | 4.71                          | 0.34 | 11.14                                  | 2.88 |
| Thermogenic 3            | -35.38                    | -100.84              | 4.78                          | 0.31 | 11.33                                  | 2.06 |
| Thermogenic 4            | -22.05                    | -101.46              | 1.79                          | 0.28 | 4.93                                   | 1.93 |
| Thermogenic 5            | -21.6                     | -100.99              | 1.56                          | 0.25 | 6.37                                   | 2.06 |
| High-temperature abiotic | -22.16                    | -87.05               | 0.32                          | 0.45 | 3.29                                   | 3.72 |
| Microbial 1              | -76.82                    | -233.47              | 5.24                          | 0.48 | -16.27                                 | 3.1  |
| Microbial 2              | -43.93                    | -370.42              | 1.72                          | 0.24 | -18.75                                 | 1.42 |
| Microbial 3              | -29.37                    | -299.2               | 1.06                          | 0.24 | -34.45                                 | 1.5  |
| Microbial 4              | -51.19                    | -311.86              | -1.28                         | 0.33 | -33.27                                 | 1.51 |
| Microbial 5              | -57.93                    | -176.34              | 3.47                          | 0.34 | -14.54                                 | 2.11 |
| Microbial 6              | -62.27                    | -231.66              | 2.86                          | 0.28 | -8.78                                  | 1.91 |
| Microbial 7              | -59.45                    | -238.41              | 2.16                          | 0.47 | -5.57                                  | 3.48 |
| Microbial 8              | -59.9                     | -228.85              | 3.33                          | 0.39 | -18.29                                 | 2.58 |
| Microbial 9              | -14.45                    | -322.49              | 2.94                          | 0.36 | -19.58                                 | 1.97 |
| air A                    | -48.11                    | -80.3                | 0.1                           | 0.4  | 41.7                                   | 2.6  |
| air B                    | -47.99                    | -84.5                | 1.87                          | 0.3  | 40                                     | 2.5  |
| air C                    | -49.84                    | -115.7               | 1.91                          | 0.38 | 42.3                                   | 3.8  |
